# Supplementary material for: Enhancing sensitivity in a piezoresistive cantilever-based label-free DNA detection assay using ssPNA sensor probes
Source: Royal Society of Chemistry journal article supplement (doi:10.1039/c3tb21392g), 2013-11-20
Supplement: c3tb21392g.pdf [file c3tb21392g.pdf]

## Supporting Information

### Enhancing Sensitivity in a Piezoresistive Cantilever-based Label-free DNA Detection Assay using ssPNA Sensor Probes

Srabani Ghosh, Sourav Mishra and Rupa Mukhopadhyay\*

Department of Biological Chemistry, Indian Association for the Cultivation of Science,  
Jadavpur, Kolkata-700 032, India

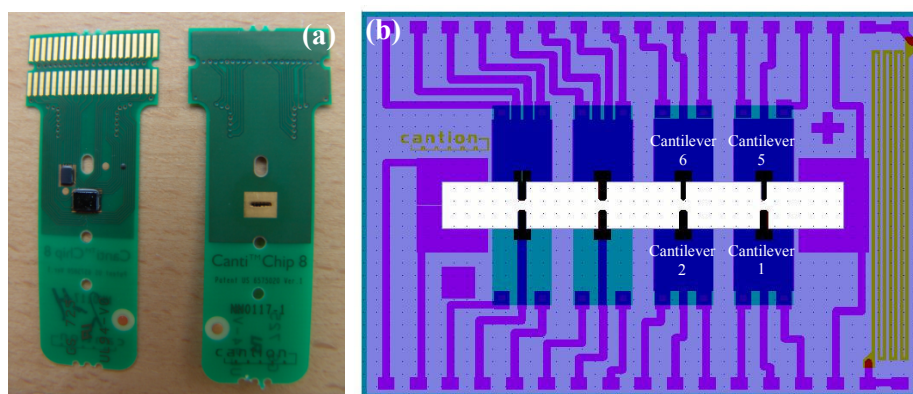

**Figure S1:** (a) CantiChip8 (both front and the back views are shown); (b) The pin connections of the CantiChip8. Figure courtesy: Nanonord A/S, Denmark.

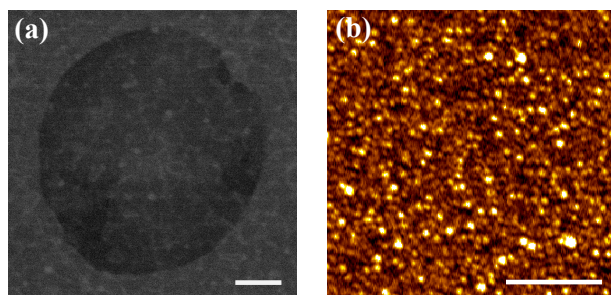

**Figure S2:** (a) SEM picture of a droplet of PNA solution as deposited by inkjet method; (b) AFM image of gold surface modified with PNA solution using inkjet method (in some areas). Scale bar for (a) 1.0  $\mu\text{m}$ , (b) 200 nm and Z range for (b) 0-1.03 nm.

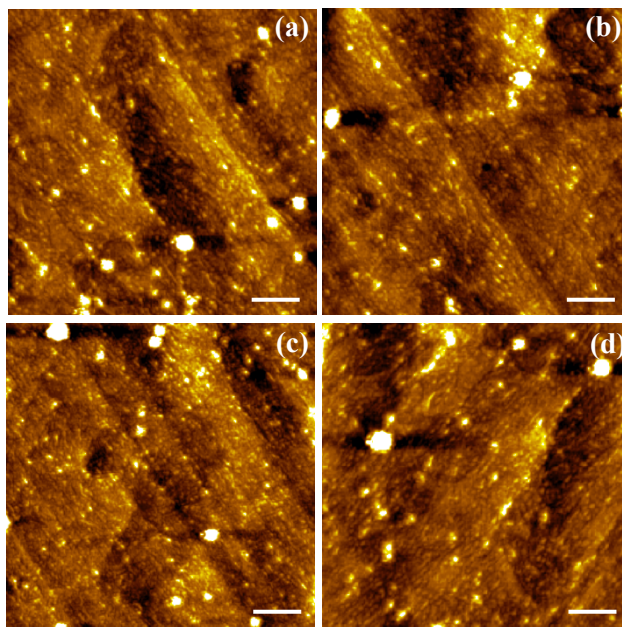

**Figure S3:** AFM topographic images of gold surface modified with PNA solution using inkjet method [scale bar for 300 nm and Z range for (a) 0–1.20 nm, (b) 0–1.22 nm, (c) 0–1.18 nm, & (d) 0–1.25 nm]
